# Supplementary material for: Enhancement in the efficiency of an organic–inorganic hybrid solar cell with a doped P3HT hole-transporting layer on a void-free perovskite active layer
Source: Royal Society of Chemistry journal article supplement (doi:10.1039/c4ta02976c), 2014-01-01
Supplement: c4ta02976c1.pdf [file c4ta02976c1.pdf]

Electronic Supplementary Information

**Enhancement in the efficiency of an organic–inorganic hybrid solar cell with a doped P3HT hole-transporting layer on a void-free perovskite active layer**

Yunlong Guo, Chao Liu, Kento Inoue, Koji Harano, Hideyuki Tanaka,\* and Eiichi Nakamura\*

Department of Chemistry, The University of Tokyo, 7-3-1 Hongo, Bunkyo-ku, Tokyo 113-0033.

- 1. Materials**
- 2. Scanning electron microscopy**
- 3. Photovoltaic performances**
- 4. Absorption and photoluminescence spectra**
- 5. Transporting property and X-ray diffraction**
- 6. Photoelectron yield spectroscopy**
- 7. Solar cell fabrication and measurement**

## 1. Materials

### Preparation for perovskite precursor

The perovskite precursor was prepared the following procedure in the reference.<sup>[1]</sup> Thus, 12 ml of hydroiodic acid (57 wt% in water, Sigma-Aldrich) was added dropwise in 2 h to 24 ml of methylamine (33 wt% in ethanol, Sigma-Aldrich) in 100-ml ethanol. Solvent was removed on a rotary evaporator, and the product was recrystallized from diethyl ether to obtain methylammonium iodide (MAI) as a crystalline powder. The powder was dried in a vacuum chamber at 65 °C for 12 h. In a glove box (N<sub>2</sub> atmosphere), MAI and PbCl<sub>2</sub> (Aldrich, 99.999%) were dissolved in dimethylformamide (Tokyo Chemical Industry Co., 99.5%) with a molar ratio of 3:1 and stirred for 12 h at 65 °C to obtain a precursor solution. Total material concentration was 20 wt%.

### Preparation of TiO<sub>x</sub> precursor <sup>[2]</sup>

To prepare a TiO<sub>x</sub> precursor solution, 438 μl of commercially available titanium isopropoxide (Tokyo Chemical Industry Co.) was diluted in isopropanol 3 ml. In a separated flask, 83 μl of a 1 M HCl solution was diluted with isopropanol (3 ml), and was added dropwise to the titanium precursor solution under rapidly stirring. The solution was filtered through a PTFE membrane filter with 0.2 μm pore size just before use.

### Materials for the hole-transporting layer

High purity regioregular P3HT (99.995%) with Mn=30000~60000, Li-TFSI (>99.0%) and D-TBP (97%) were purchased from Aldrich. High purity chlorobenzene was used as solvent for P3HT.

## 2. Scanning electron microscopy

SEM observations were conducted on an FEI Magellan 400L equipped with AMETEK/EDAX Genesis APEX4 at a landing voltage of 1 kV under a reduced pressure of  $5 \times 10^{-5}$  Pa.

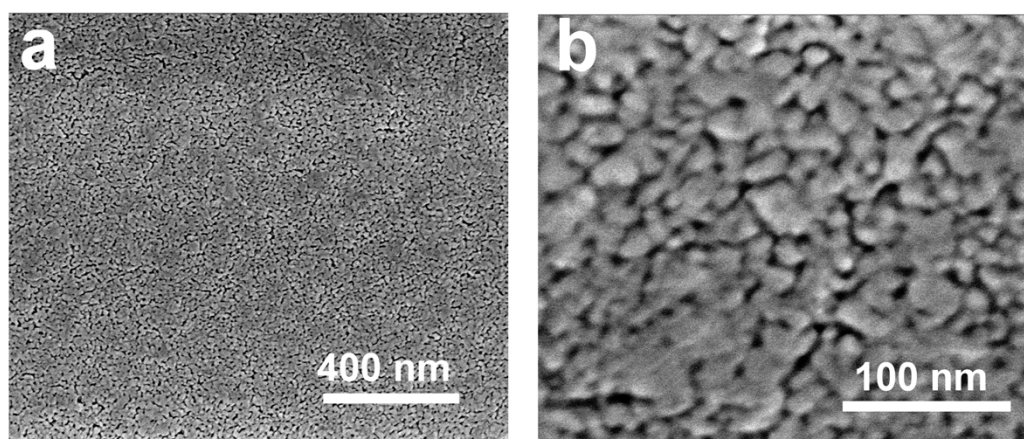

**Figure S1.** SEM image of TiO<sub>x</sub> coated on ITO substrate (a), and enlarge image (b)

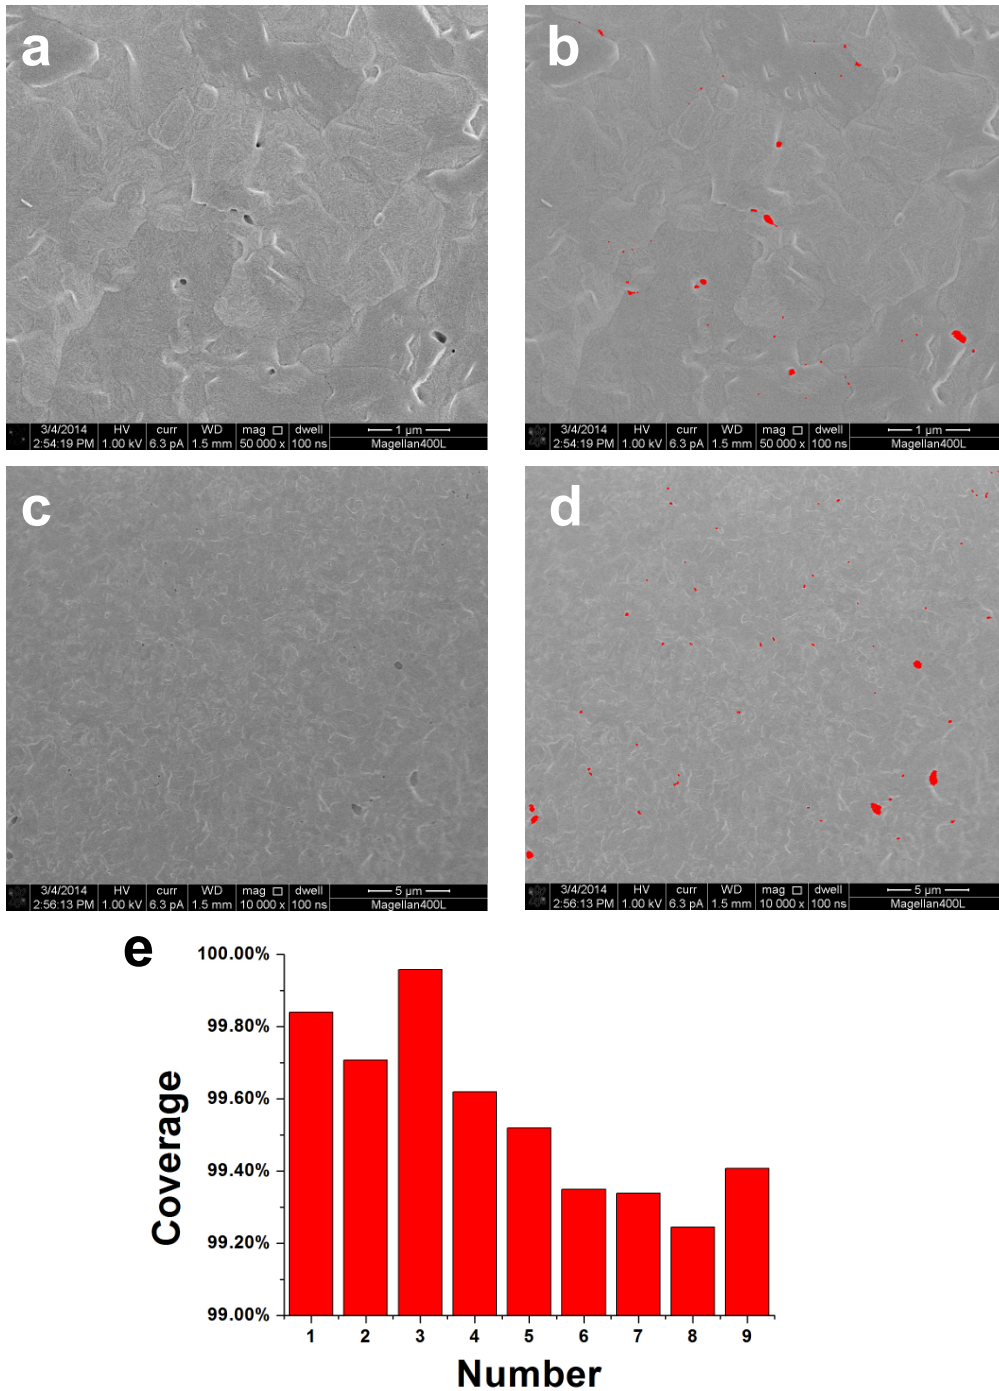

**Figure S2.** Original SEM images (a,c) and void-labeled SEM images (b, d) of the rapidly cooled perovskite layer. Estimated coverage is 99.84% based on the integration of the red area in (b), and 99.71% estimated from (d). (e) Statistical analysis the coverage based on 9 different samples. The average value is 99.55% ( $\pm$  0.24%).

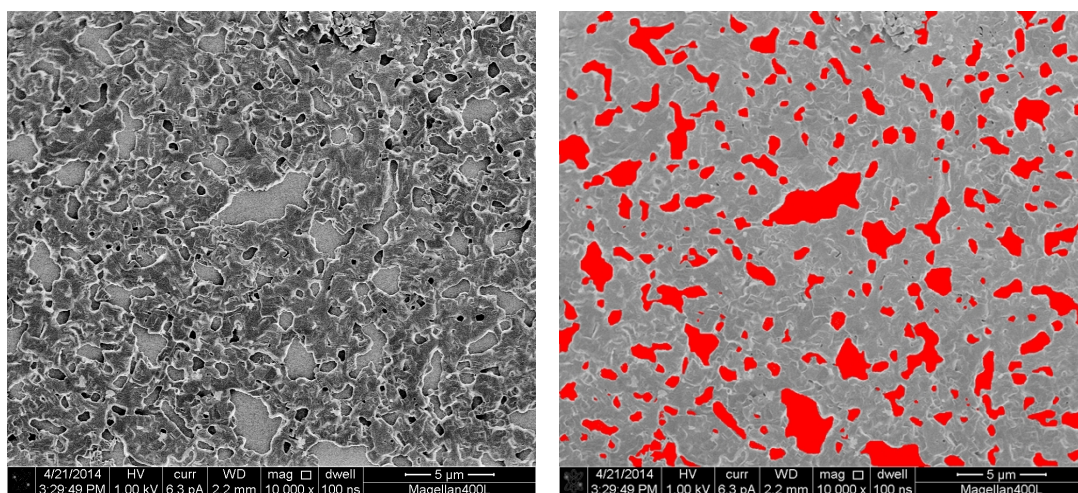

**Figure S3.** Original SEM images (left) and void-labeled SEM images (right) of the rapidly cooled perovskite layer of slowly cooled perovskite layer. Estimated coverage is here 82.2%.

### 3. Photovoltaic performances

**Table S1.** The details of photovoltaic performance of solar cell using HTLs H-1 to H-6 containing P3HT, Li-TFSI and D-TBP in a variety of ratios.

| HTL | P3HT <sup>a</sup><br>(mg) | Li-TFSI <sup>b</sup><br>(mg) | D-TBP <sup>c</sup><br>(mg) | $J_{sc}$<br>(mA·cm <sup>-2</sup> ) | $V_{oc}$<br>(V) | FF<br>(%) | PCE<br>(%) | $R_s$<br>(Ω·cm <sup>2</sup> ) | $\sigma$<br>(S·m <sup>-1</sup> ) |
|-----|---------------------------|------------------------------|----------------------------|------------------------------------|-----------------|-----------|------------|-------------------------------|----------------------------------|
| H-1 | 15                        | 0                            | 0                          | 17.7                               | 0.92            | 56.2      | 9.2        | 12.4                          | $5.4 \times 10^{-4}$             |
| H-2 | 15                        | 0.54                         | 0                          | 19.3                               | 0.94            | 61.5      | 11.2       | 8.9                           | $5.4 \times 10^{-2}$             |
| H-3 | 15                        | 0.54                         | 8.8                        | 19.1                               | 0.98            | 66.3      | 12.4       | 8.5                           | $6.4 \times 10^{-2}$             |
| H-4 | 15                        | 0                            | 8.8                        | 17.5                               | 0.89            | 41.6      | 6.5        | 48.3                          | $3.4 \times 10^{-3}$             |
| H-5 | 15                        | 0.07                         | 2.9                        | 18.8                               | 0.94            | 57.8      | 10.2       | 12.5                          | $4.3 \times 10^{-2}$             |
| H-6 | 15                        | 0.19                         | 2.9                        | 19.9                               | 0.96            | 61.2      | 11.7       | 11.3                          | $5.0 \times 10^{-2}$             |

<sup>a</sup>P3HT dissolved in 1 ml chlorobenzene, <sup>b</sup>Li-TFSI dissolved in 6.8 μl acetonitrile, <sup>c</sup>D-TBP (3.4 μl (2.9 mg) or 10.2 μl (8.8 mg)) was added into the P3HT:Li-TFSI mixture solution.

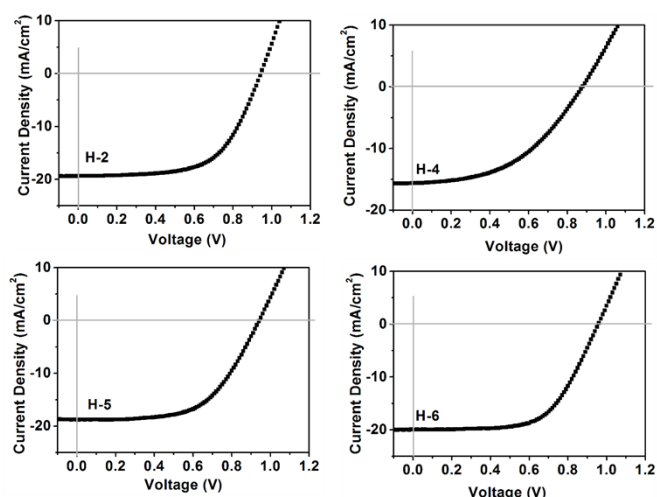

**Figure S4.** J-V curves of the cell using H-2, H-4, H-5, and H-6 as HTL.

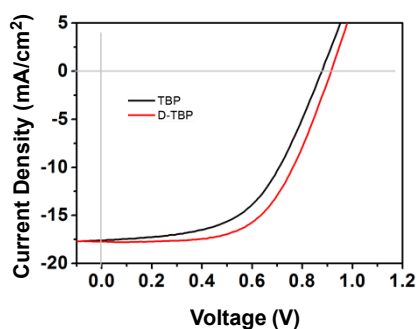

| Additive | $J_{sc}$<br>( $\text{mA}\cdot\text{cm}^{-2}$ ) | $V_{oc}$<br>(V) | FF<br>(%) | PCE<br>(%) |
|----------|------------------------------------------------|-----------------|-----------|------------|
| D-TBP    | 17.7                                           | 0.91            | 59.0      | 9.1        |
| TBP      | 17.6                                           | 0.94            | 54.0      | 8.4        |

**Fig**

**Figure S5.** J-V curves and the photovoltaic parameters of the cell using D-TBP or TBP (3.4  $\mu\text{l}$ ) added P3HT (15mg dissolved in 1 ml chlorobenzene) with the Li-TFSI (6.8  $\mu\text{l}$  acetonitrile).

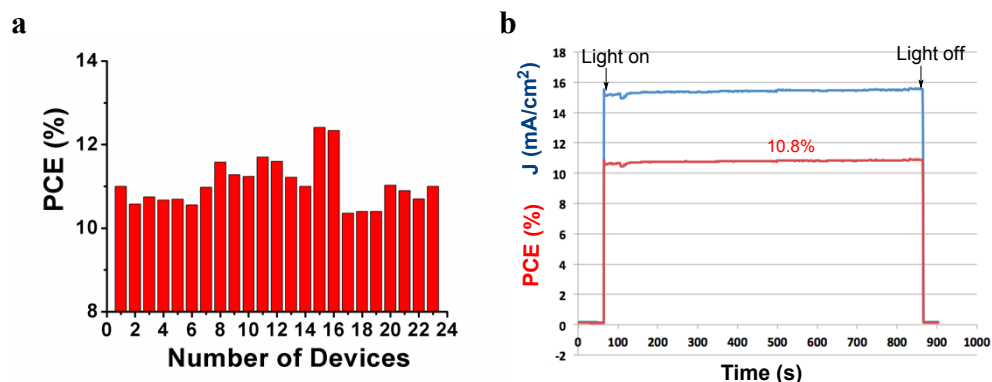

**Figure S6.** Solar cell performances of the H-3 devices. (a) Statistical distribution of 23 devices. The average value of PCE is 11.1% ( $\pm 0.55\%$ ). (b) Photocurrent density and power conversion efficiency at 0.7 V applying voltage under the irradiation of 10.8% device.

#### 4. Absorption and photoluminescence spectra

Absorption spectrum of the perovskite thin films was recorded on a Jasco V-670 spectrophotometer, and photoluminescence was examined on a fluorescence spectrophotometer (HITACHI, F-4500).

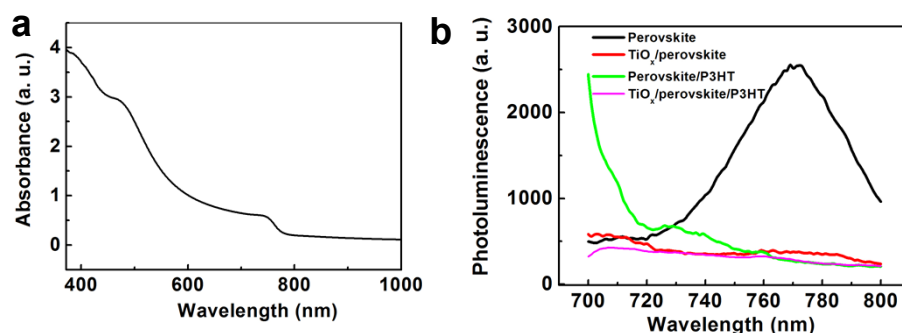

**Figure S7.** Absorption spectrum of the perovskite thin films (a), and the photoluminescence (b) from the perovskite on the different configuration perovskite/pristine P3HT, TiO<sub>x</sub>/perovskite and TiO<sub>x</sub>/perovskite/pristine P3HT. All thin films were coated on to the quartz substrate.

#### 5. Transporting property and X-ray diffraction

To measure the field-effect mobility, we fabricated bottom-gate/bottom contact field-effect transistor devices on SiO<sub>x</sub>/Si wafer. Highly doped Si and SiO<sub>x</sub> (300 nm) formed gate electrode and gate dielectrics, respectively. The source and drain electrodes based on gold were prepared by photolithography. The channel length and width were 9 μm and 325 μm, respectively. A hole transporting material containing different additives (15 mg/ml, in chlorobenzene) was spin-coated its surface in a glove-box and encapsulated before the measurements. The I-V characteristics were obtained on a Keithley SCS 4200 in air and the linear region mobility was calculated according to the following formula:

$$\mu = \frac{\partial I_{DS}}{\partial V_{GS}} \frac{L}{WC_i V_{DS}}$$

Here, the I<sub>DS</sub> is the current collected by drain electrode and V<sub>GS</sub> is gate voltage, L is the channel length and W is the channel width. The C<sub>i</sub> is the capacitance of gate dielectrics and V<sub>DS</sub> is the voltage between drain and source.

The XRD experiment was performed on a Rigaku SmartLab X-Ray diffractometer equipped with a D/teX Ultra detector. The measurement employed the Cu-Kα line focused radiation at a 9 kW (45 kV, 200 mA) power using a 0.02° 2θ step scan from 3.0–30.0° with a scanning speed of 10° min<sup>-1</sup>.

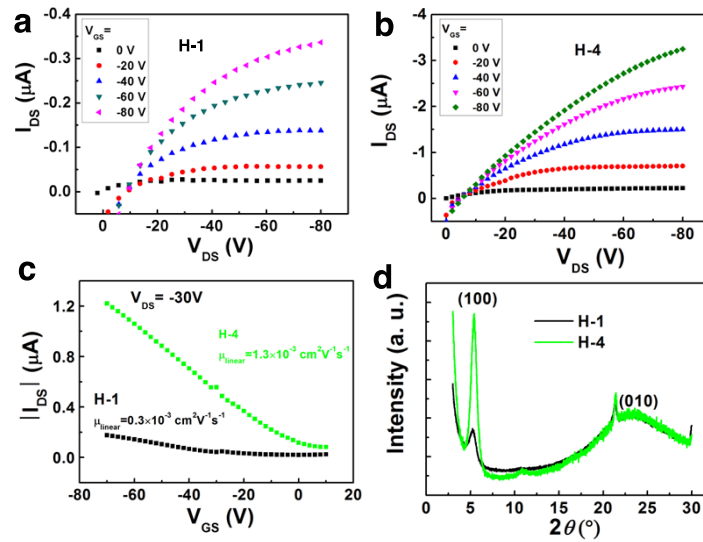

**Figure S8.** The I-V characteristics of field-effect transistor devices (a–c) and XRD (d) of different HTL layers. The output curves of H-1 (a) and H-4 thin films (b), and its corresponding transfer curves (c).

## 6. Photoemission yield spectroscopy

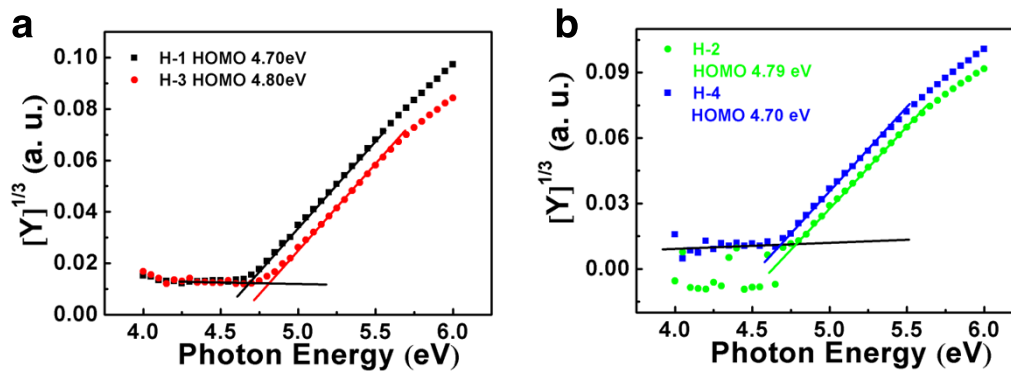

**Figure S9.** Photoemission spectra of different P3HT thin-films, (a) H-1 (black square, pristine P3HT) and H-3 (red circle, P3HT doped with Li-TFSI and D-TBP), and (b) H-2 (green circle, P3HT doped with Li-TFSI) and H-4 (blue square, P3HT mixed with D-TBP) coated on ITO substrate. The HOMO level was estimated from the intersection of base line (black) and liner fit lines.

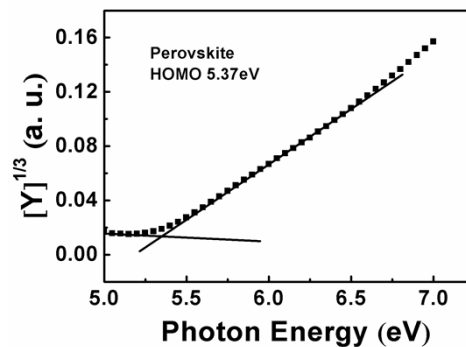

**Figure S10.** Photoemission spectrum of perovskite thin-film coated on ITO substrate.

## 7. Solar cell fabrication and measurement

An indium tin oxide (ITO) layer on the glass substrate used for this study was 145 nm thick with a sheet resistance of  $8 \Omega/\text{square}$ . The surface roughness,  $R_a$ , was 0.7 nm and the  $R_{\text{max}}$  was 8.1 nm. Prior to the formation of the buffer layer, the patterned ITO glass was ultrasonically cleaned using a surfactant, rinsed with water, and then finally given UV–ozone treatment. A 45-nm thick electron-transporting layer  $\text{TiO}_x$  was deposited by spin-coating (3000 rpm for 30s) of the precursor solution (see materials section) and annealed at  $500 \text{ }^\circ\text{C}$  for 30 min in air atmosphere. To form the  $\text{CH}_3\text{NH}_3\text{PbCl}_x\text{I}_{3-x}$  layer, a 20 wt% precursor solution was spin-coated on the  $\text{TiO}_x$  layer at 500 rpm for 60s and annealed at  $95 \text{ }^\circ\text{C}$  for 100 min in a nitrogen-filled glove box. The hole-transporting layer (see materials section) was then deposited by spin coating (2500 rpm for 30s). The top electrode (Ag, 150 nm) was deposited through a metal shadow mask, which defined a 2 mm stripe pattern perpendicular to the ITO stripe. Finally, the fabricated cell was encapsulated with backing glass using a UV-curable resin under nitrogen atmosphere.

The encapsulated cells were subjected to  $J$ – $V$  measurements under both dark and irradiated conditions. Current–voltage sweeps were taken on a Keithley 2400 source measurement unit controlled by a computer. The light source used to determine the PCE was an AM1.5G solar simulator system (Sumitomo Heavy Industries Advanced Machinery) with intensity of  $100 \text{ mW}/\text{cm}^2$ . The solar cells were masked with a metal aperture to define the active area, typically  $4 \text{ mm}^2$ . The details of  $J$ – $V$  curve test were as follows: step-size, 0.01V; dwelling time, 0.01s; the scanning range from 1.2 V to –0.3 V. For the external quantum efficiency measurement, a constant power mode was employed using monochromatized photons from halogen or xenon lamps. And for the estimation of IQE spectrum, one-time reflection spectrum from the cell was measured by V-670 spectrophotometer.

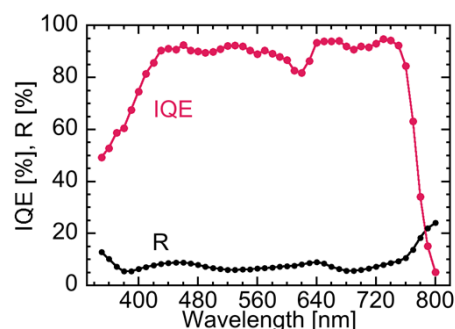

**Figure S11.** The IQE and reflectance spectra of optimized perovskite solar cells using hole-transporting H-3.

[1] Lee, M. M.; Teuscher, J.; Miyasaka, T.; Murakami, T. N.; Snaith, H. J. *Science* **2012**, *338*, 643.

[2] Docampo, P.; Ball, J. M.; Darwich, M.; Eperon, G. E.; Snaith, H. J. *Nat. Commun.* **2013**, *4*:2761 doi: 10.1038/ncomms3761.
